# Supplementary material
Source: publisher figshare collection journal article supplement (https://acs.figshare.com/ndownloader/files/4677664)
Supplement: Supplementary file 1 [file 4677664]

1 **AN OPEN AIR BIOCATHODE ENABLES EFFECTIVE ELECTRICITY**

2 **GENERATION WITH MICROBIAL FUEL CELLS**

3 Peter Clauwaert, David van der Ha, Nico Boon, Kim Verbeken, Marc Verhaege,

4 Korneel Rabaey and Willy Verstraete

5

6

7

8 **Summary:**

9 **Page S2: Table S1**

10 **Page S3: Figure S1**

11 **Page S4: Figure S2**

12

13

14

15

16

17

18

19

20

21

1 **Table S1: Overview of the organisms (O1-O9) corresponding with the**  
 2 **sequenced bands on the DGGE represented in Figure S1.D. Identification was**  
 3 **performed with the RDP Classification Algorithm. The probability values are**  
 4 **given between brackets.**

|           | <b>Phylum</b>           | <b>Order</b>            | <b>Family</b>             | <b>Genus</b>                     |
|-----------|-------------------------|-------------------------|---------------------------|----------------------------------|
| <b>O1</b> | TM7 (100%)              |                         |                           | Genera_incertae_sedis_TM7 (100%) |
| <b>O2</b> | γ-Proteobacteria (100%) | Pseudomonadales (100%)  | Pseudomonadaceae (100%)   | Pseudomonas (100%)               |
| <b>O3</b> | γ-Proteobacteria (100%) | Xanthomonadales (100%)  | Xanthomonadaceae (100%)   | Hydrocarboniphaga (100%)         |
| <b>O4</b> | α-Proteobacteria (100%) | Sphingomonadales (100%) | Sphingomonadaceae ((100%) | Novosphigobium (69%)             |
| <b>O5</b> | α-Proteobacteria (100%) | Sphingomonadales (100%) | Sphingomonadaceae (100%)  | Sphingopyxis (100%)              |
| <b>O6</b> | α-Proteobacteria (100%) | Rhizobiales (100%)      | Hyphomicrobiaceae (99%)   | Xantobacter (95%)                |
| <b>O7</b> | α-Proteobacteria (98%)  | Rhizobiales (83%)       | Methylocystaceae (59%)    | Albibacter (57%)                 |
| <b>O8</b> | α-Proteobacteria (100%) | Rhodobacterales (100%)  | Rhodobacteraceae (100%)   | Catellibacterium (54%)           |
| <b>O9</b> | α-Proteobacteria (100%) | Rhodobacterales (100%)  | Rhodobacteraceae (100%)   | Catellibacterium (63%)           |

5  
6  
7  
8  
9  
10  
11  
12  
13  
14  
15  
16  
17  
18

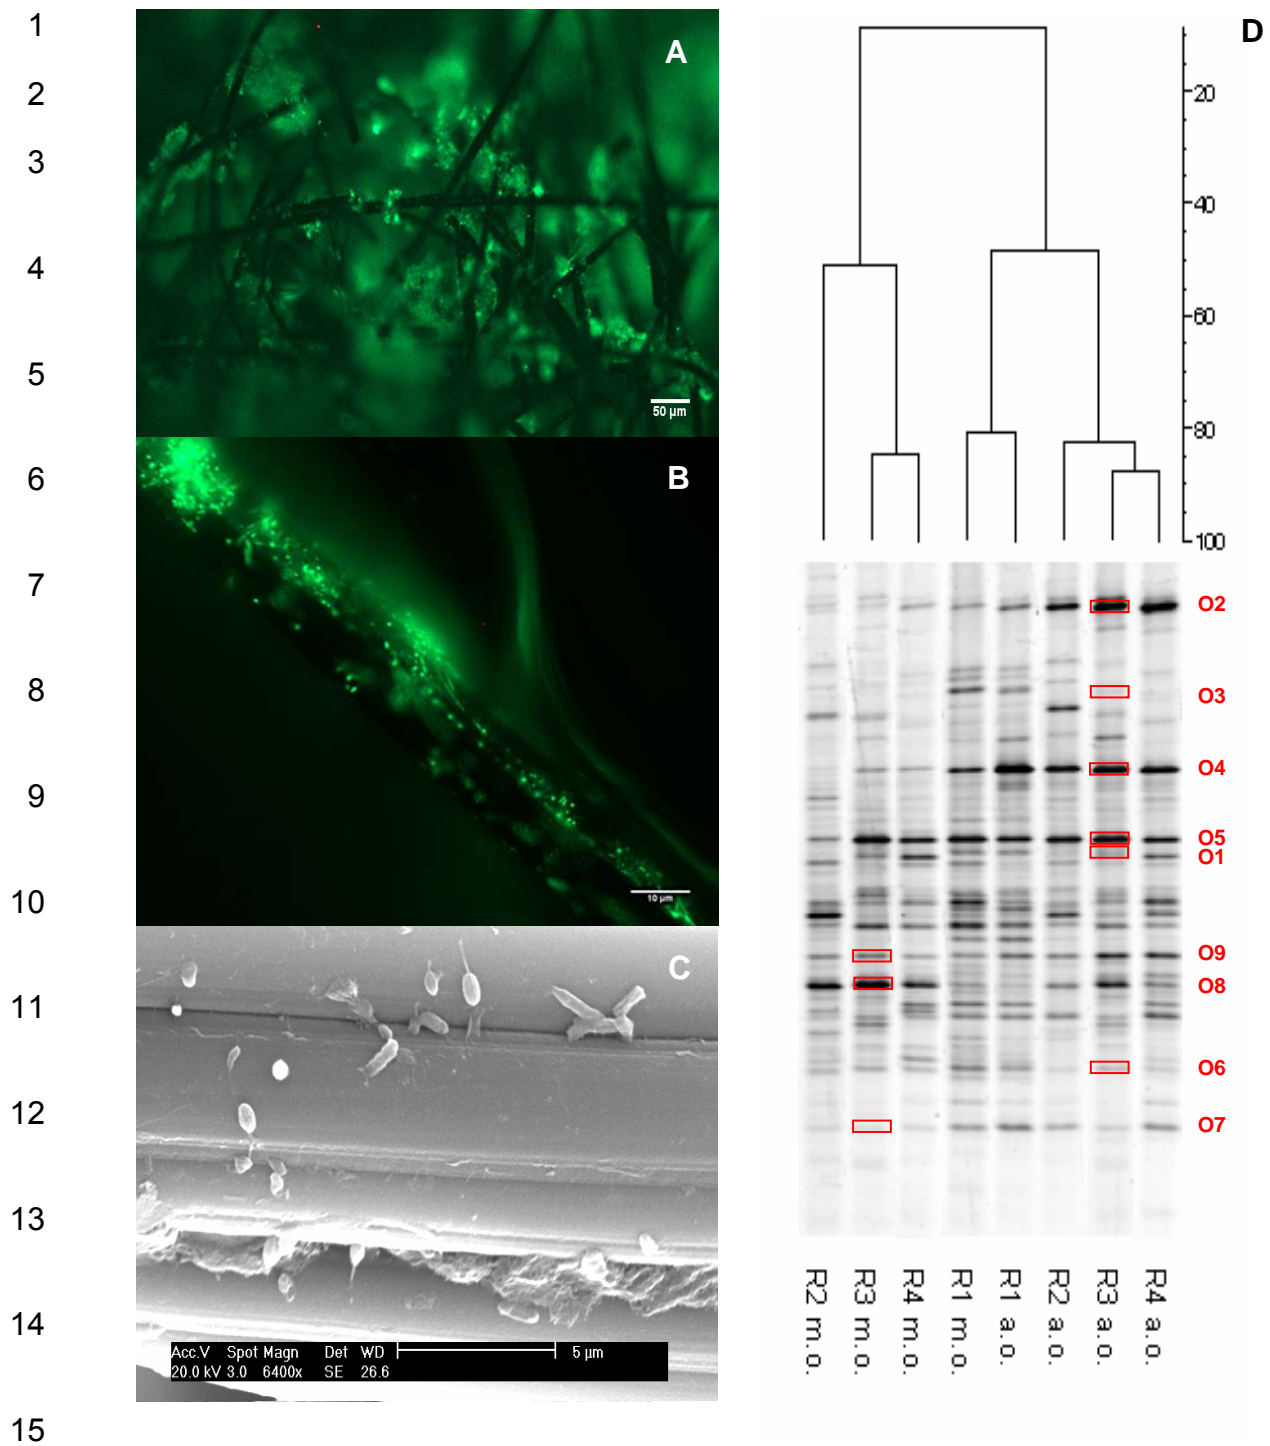

16 **Figure S1: Epifluorescence microscopy images (A, B) and a secondary electron**  
 17 **image (SEM) (C) of cathodic graphite fibers. DGGE pattern of the different**  
 18 **biofilms on the cathodic felts after 5 months of operation; both the membrane**  
 19 **oriented side (m.o.) as the air oriented side (a.o.) of the cathodic graphite felt**  
 20 **were investigated (D) – The organisms (O1-O9) are indicated in Table S1**

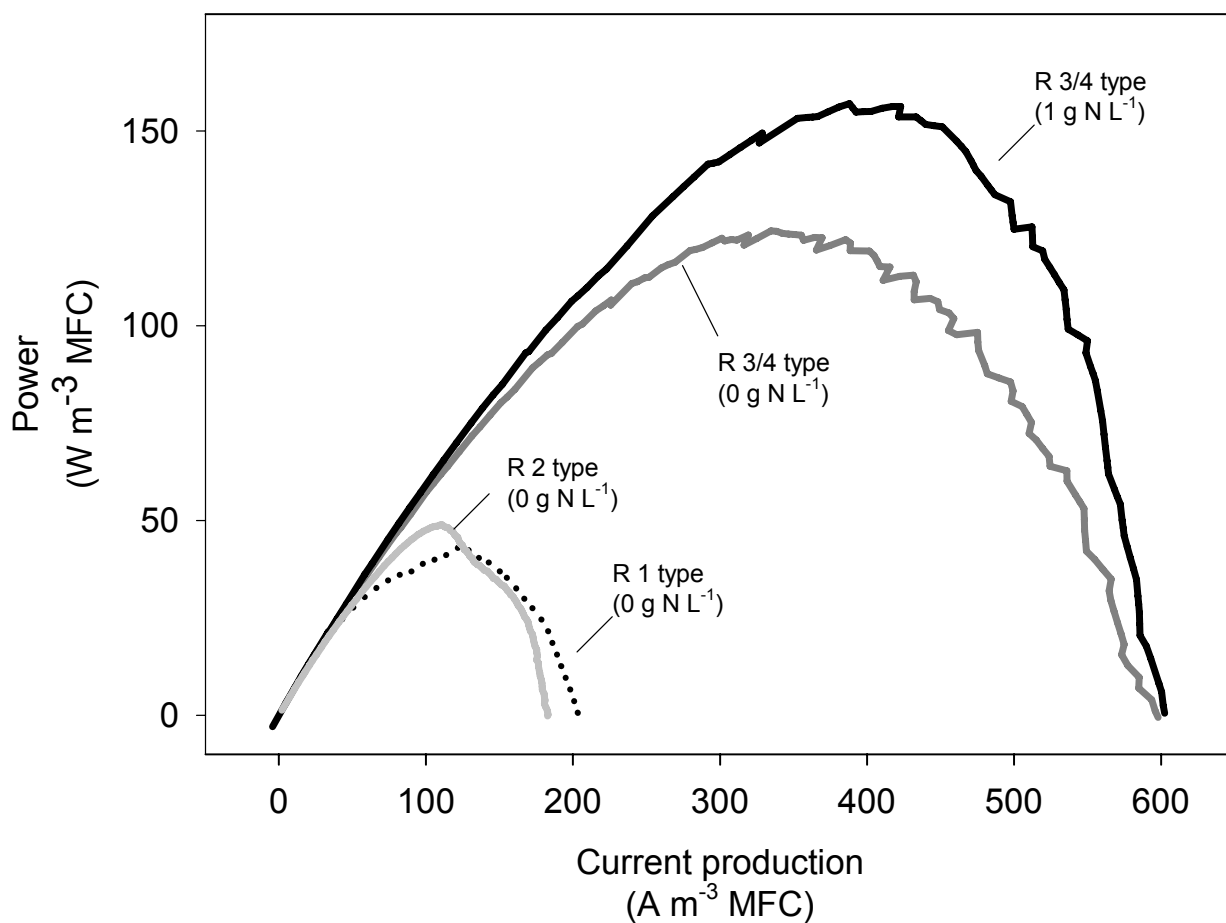

1  
2  
3  
4  
5  
6  
7  
8

**Figure S2: Power density curves (scan rate: 1 mV s<sup>-1</sup>) for the different reactor designs (R1, R2 and R3/4) with 0.05 M ferricyanide as a cathodic electron acceptor (0.1 M phosphate buffer). The OCV was between 0.651 V and 0.708 V**
